# Supplementary material for: Magnitude, risk factors and antimicrobial susceptibility pattern of Shigella and Salmonella, among children with diarrhea in Southern Ethiopia: A Cross-sectional Study
Source: PubMed Central journal article supplement — SAGE Open Med. 2021 Apr 16;9:20503121211009729. doi: 10.1177/20503121211009729 (PMC8053760; doi:10.1177/20503121211009729), 2021-04-16
Supplement: sj-pdf-1-smo-10.1177_20503121211009729.pdf [file sj-pdf-1-smo-10.1177_20503121211009729.pdf]

## Informed consent

I have been informed about, the objective of the study entitled “ The Magnitude of *Shigella* and *Salmonella*, their Antibiotics Susceptibility Pattern and Associated Risk Factors among Children with Diarrhea in Southern Ethiopia: a Cross-Sectional Study”, the response I gave kept confidential, there will be no incurred risks to my child as a result of participating in the study, the benefit to my child and the right to refuse to take part in the study and also I have had the opportunity to ask questions about the project and received clarification to my satisfaction in a language I understand. Therefore, with a full understanding of the situations, I..... voluntarily consent for my child to take part and to give the entire necessary information and sample needed for laboratory analysis in the study being conducted.

Signature: \_\_\_\_\_

Date: \_\_\_\_\_

### **Annex II: Questionnaire English Version**

Hawassa University Natural and Computational Science

Department of Biology

| Sn: | Questions                    | Coding                                                                                                | Remark |
|-----|------------------------------|-------------------------------------------------------------------------------------------------------|--------|
| 1   | Pediatric age group          | 1. 0-4<br>2. 5-9<br>3. 10-14                                                                          |        |
| 2   | Sex:                         | 1. Male<br>2. Female                                                                                  |        |
| 3   | Mother's educational status: | 1. Illiterate<br>2. Read and write<br>3. Elementary school<br>4. High school<br>5. Collage/university |        |
| 4   | Mothers marital status;      | 1. Single<br>2. Married<br>3. Divorce                                                                 |        |

|    |                              |                                                                                                                                                                                          |  |
|----|------------------------------|------------------------------------------------------------------------------------------------------------------------------------------------------------------------------------------|--|
| 5  | What is your occupation?     | <ol style="list-style-type: none"> <li>1. Farmer</li> <li>2. Government employ</li> <li>3. Merchant</li> <li>4. Housewife</li> <li>5. House made</li> <li>6. Others: specify:</li> </ol> |  |
| 6  | Monthly income birr/ETB      | <ol style="list-style-type: none"> <li>1. 500 -1500</li> <li>2. &gt;1500</li> </ol>                                                                                                      |  |
| 7  | History of Diarrherea        | <ol style="list-style-type: none"> <li>1. Yes</li> <li>2. No</li> </ol>                                                                                                                  |  |
| 8  | Type of diarrhea             | <ol style="list-style-type: none"> <li>1. Watery</li> <li>2. Bloody</li> <li>3. Mucoid</li> </ol>                                                                                        |  |
| 9  | Frequency of diarrhea        | <ol style="list-style-type: none"> <li>1. Once</li> <li>2. Twice</li> <li>3. &gt;Three</li> </ol>                                                                                        |  |
| 10 | Treatment taken for diarrhea | <ol style="list-style-type: none"> <li>1. Yes</li> <li>2. No</li> </ol>                                                                                                                  |  |
| 11 | Type of treatment            | <ol style="list-style-type: none"> <li>1. Antibiotic+ ORS</li> <li>2. Antibiotic only</li> <li>3. No treatment taken</li> </ol>                                                          |  |
| 12 | Duration of diarrhea         | <ol style="list-style-type: none"> <li>1. 1-2 days</li> <li>2. 3-4 days</li> <li>3. 5-6 days</li> <li>4. More than a week</li> </ol>                                                     |  |
| 13 | Sign and symptoms            | <ol style="list-style-type: none"> <li>1. Weight loss</li> <li>2. Fever</li> <li>3. Vomiting</li> <li>4. Frequent diarrhea</li> <li>5. More than one symptoms</li> </ol>                 |  |
| 14 | Laboratory confirmation      | <ol style="list-style-type: none"> <li>1. Yes</li> <li>2. No</li> </ol>                                                                                                                  |  |

|    |                                             |                                                                                                                                                      |  |
|----|---------------------------------------------|------------------------------------------------------------------------------------------------------------------------------------------------------|--|
| 15 | Method of Confirmation                      | <ol style="list-style-type: none"> <li>1. Stool culture</li> <li>2. Microscopy</li> <li>3. Do not know</li> <li>4. Not examined</li> </ol>           |  |
| 16 | Time of taking the same antibiotic          | <ol style="list-style-type: none"> <li>1. Repeatedly</li> <li>2. Sometimes</li> <li>3. Not used the same antibiotics</li> <li>4. Un known</li> </ol> |  |
| 17 | Source of drinking water                    | <ol style="list-style-type: none"> <li>1. Pipe water</li> <li>2. Home treated pipe water</li> <li>3. Bottled water</li> </ol>                        |  |
| 18 | Washing of child hand after toilet          | <ol style="list-style-type: none"> <li>1. Always</li> <li>2. Sometimes</li> </ol>                                                                    |  |
| 19 | Food/drink taken before illness             | <ol style="list-style-type: none"> <li>1. Cooked food</li> <li>2. Overnight food</li> <li>3. Raw vegetable</li> <li>4. Raw milk</li> </ol>           |  |
| 20 | Storage of cooked food                      | <ol style="list-style-type: none"> <li>1. Open containers</li> <li>2. Closed containers</li> </ol>                                                   |  |
| 21 | Habit of hand washing before and after meal | <ol style="list-style-type: none"> <li>1. Yes</li> <li>2. No</li> </ol>                                                                              |  |
| 22 | Malnutrition                                | <ol style="list-style-type: none"> <li>1. Yes</li> <li>2. No</li> </ol>                                                                              |  |
| 23 | Vaccination                                 | <ol style="list-style-type: none"> <li>1. Yes</li> <li>2. No</li> </ol>                                                                              |  |
| 24 | Contact with domestic animals               | <ol style="list-style-type: none"> <li>1. Yes</li> <li>2. No</li> </ol>                                                                              |  |
